# Supplementary material
Source: PubMed Central journal article supplement (PMC7834737)
Supplement: mmc1.pdf [file mmc1.pdf]

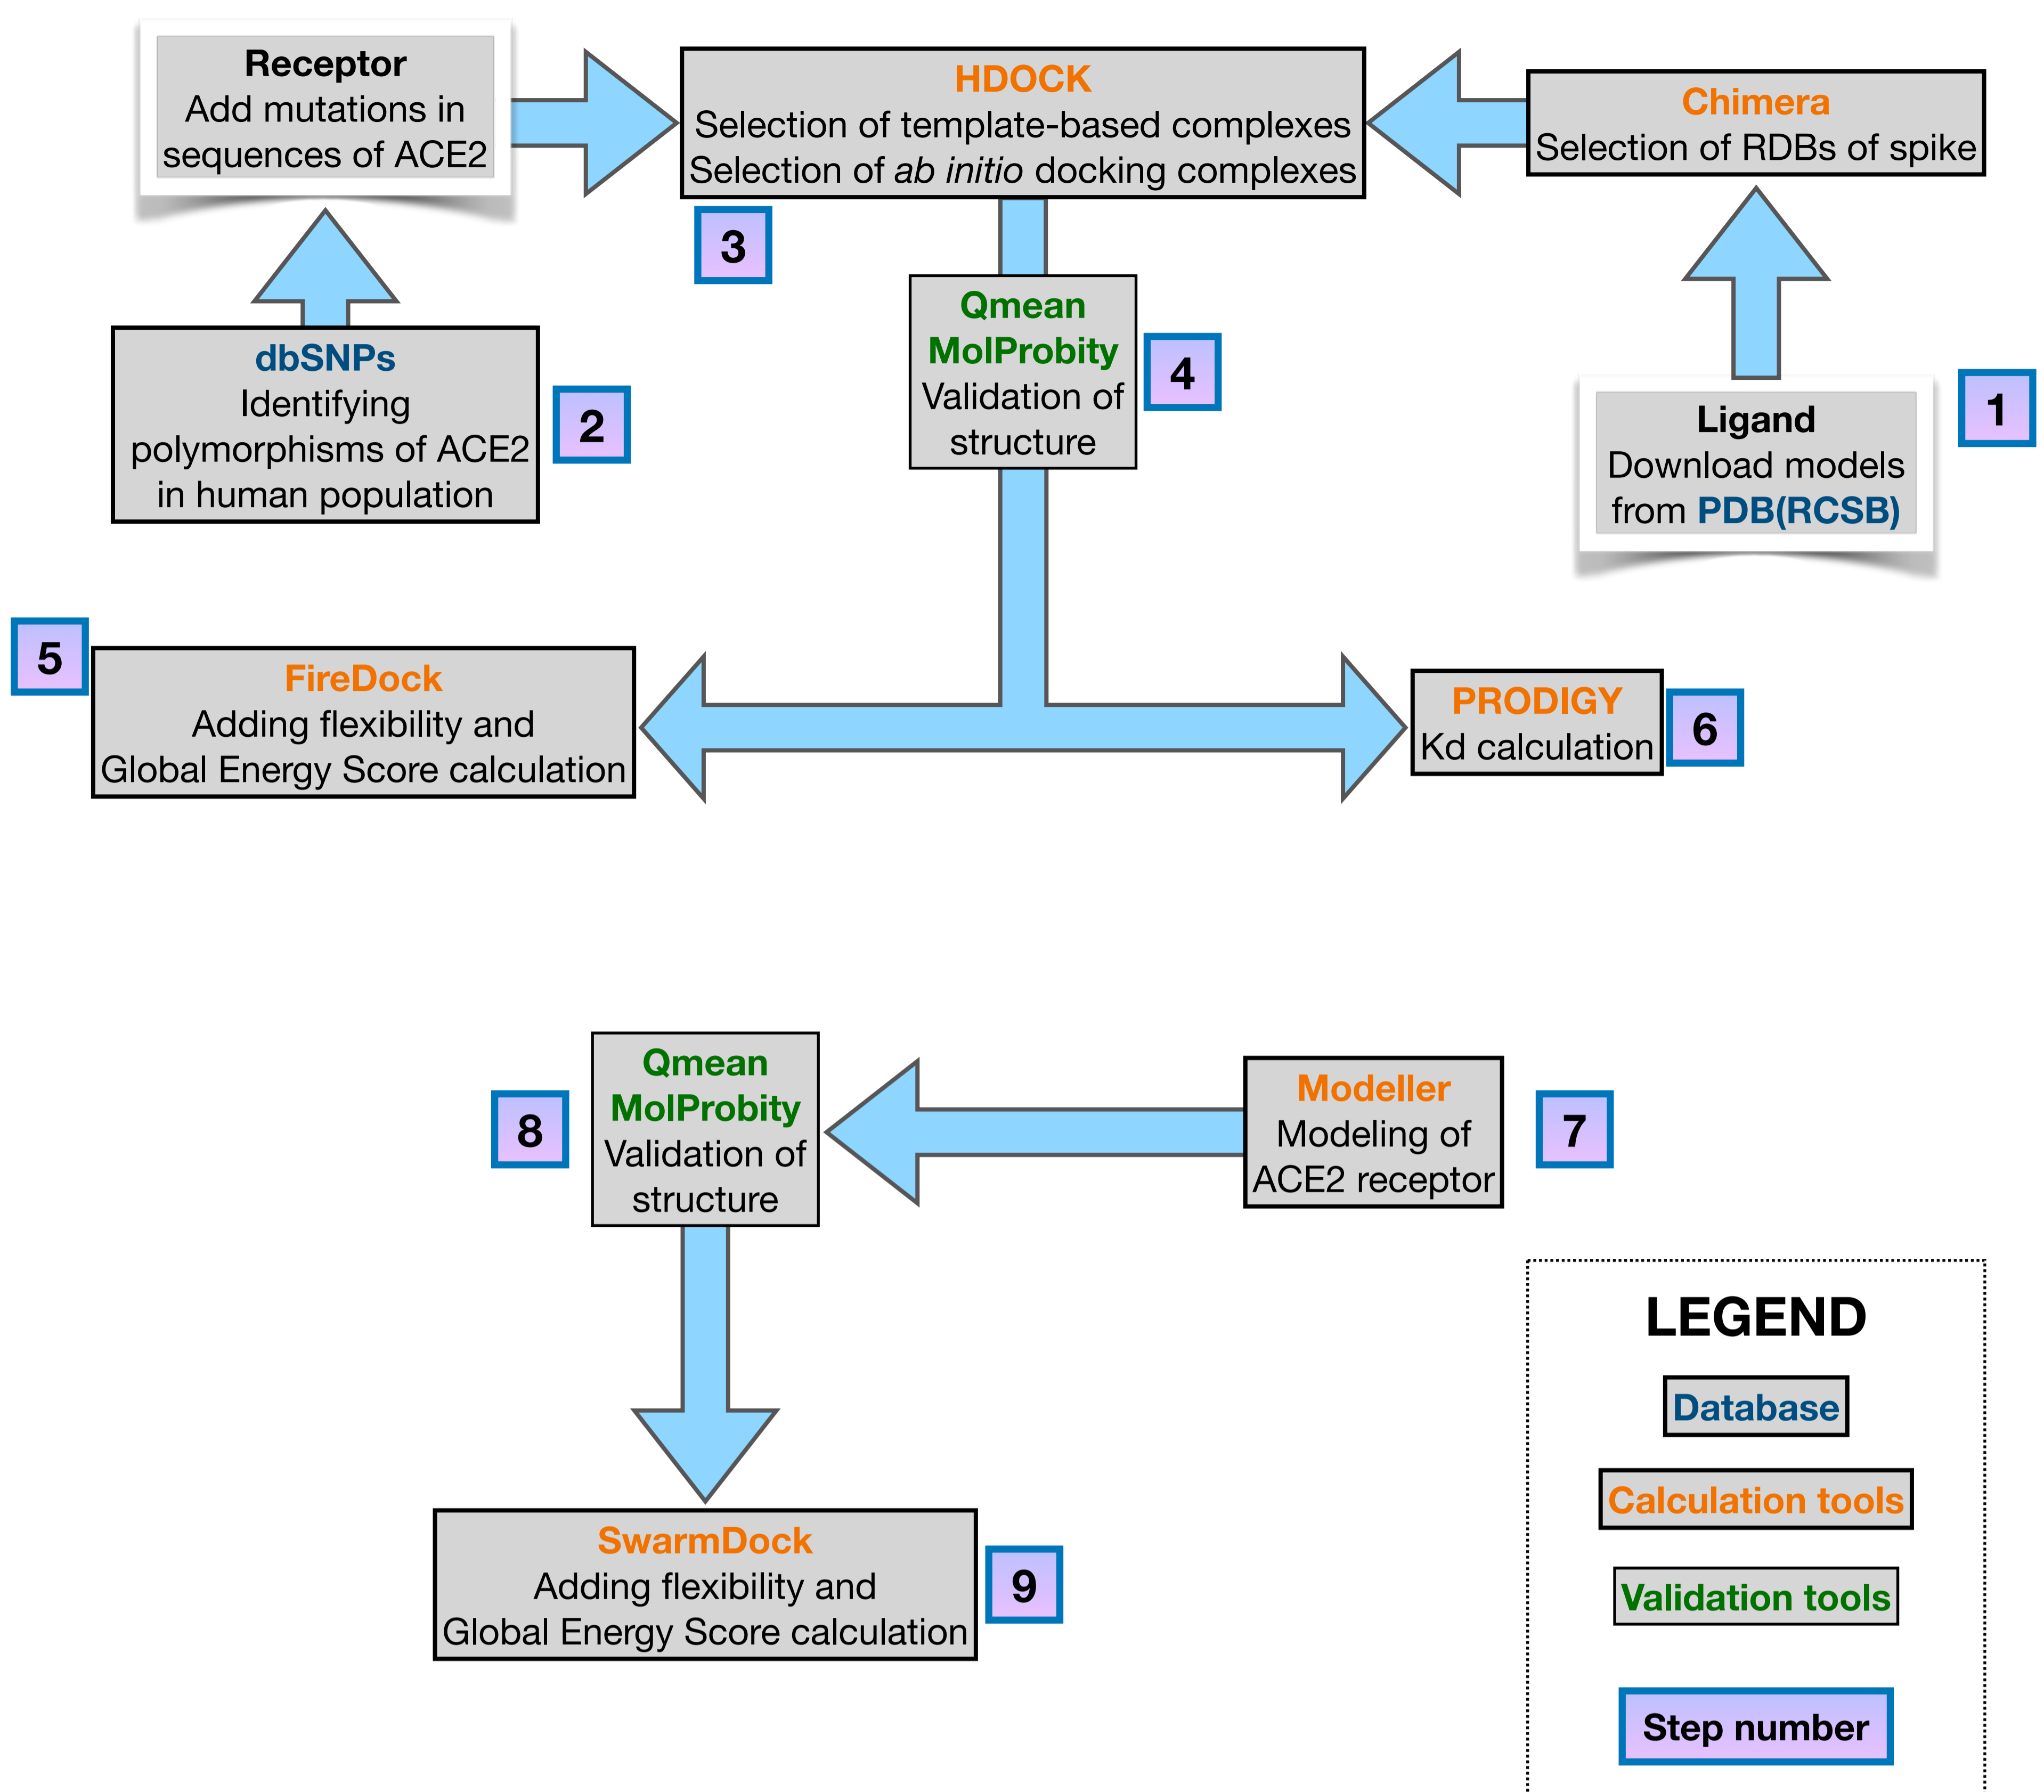

### ACE2 missense variant - protocol

- 6LZG, 6M0J and 6M17 models were downloaded from PDB (RCSB). RDBs were selected with Chimera and saved in a separate .pdb file.
- The amino acid residues of the wild type ACE2 sequence were replaced with those of the missense variant from dbSNP database
- ACE2/RDB complexes were assembled by HDOCK.
- Qmean and MolProbitry were used to validated HDOCK complexes.
- Complexes were then analyzed by FireDock for adding flexibility and global energy score calculation.
- PRODIGY was used to calculate the dissociation constants of ACE2/RBD complexes.
- MODELLER 9.25 was used in parallel to confirm HDOCK models.
- Qmean and MolProbitry were used to validated MODELLER 9.25 complexes.
- SwarmDock was used to perform a docking (receptor models of step 7; ligand the pdb files of step 1).

Step 3, 4 and 5 were repeated in order to calculate the binding affinity between ACE2 and RBD variants. ACE2 sequences were used as receptor while and asRDB variants sequences were used as ligands.
