# Supplementary material
Source: PubMed Central journal article supplement (PMC7834737)
Supplement: mmc2.pdf [file mmc2.pdf]

**6LZG/6M0J**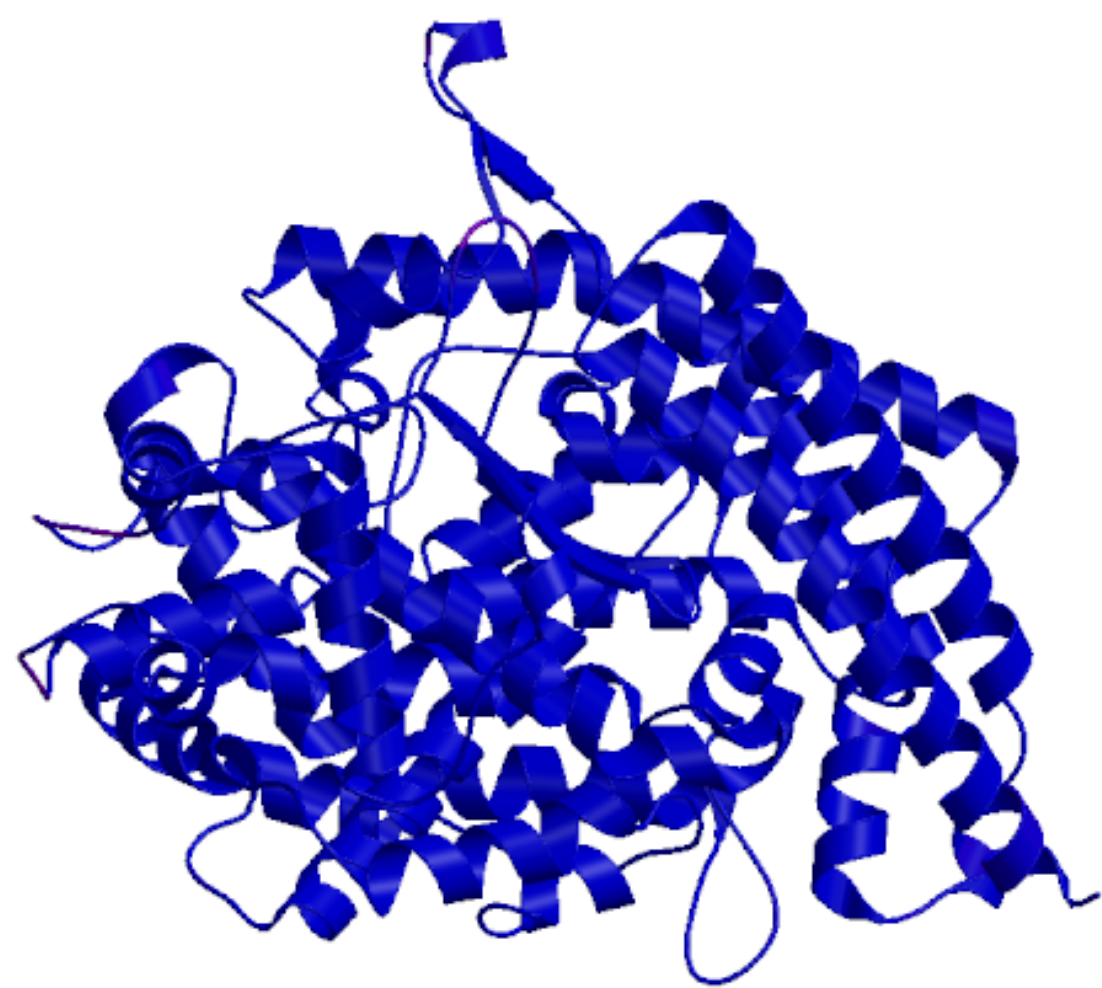

Global Score  
0.88 ± 0.05

**Hdock WT model**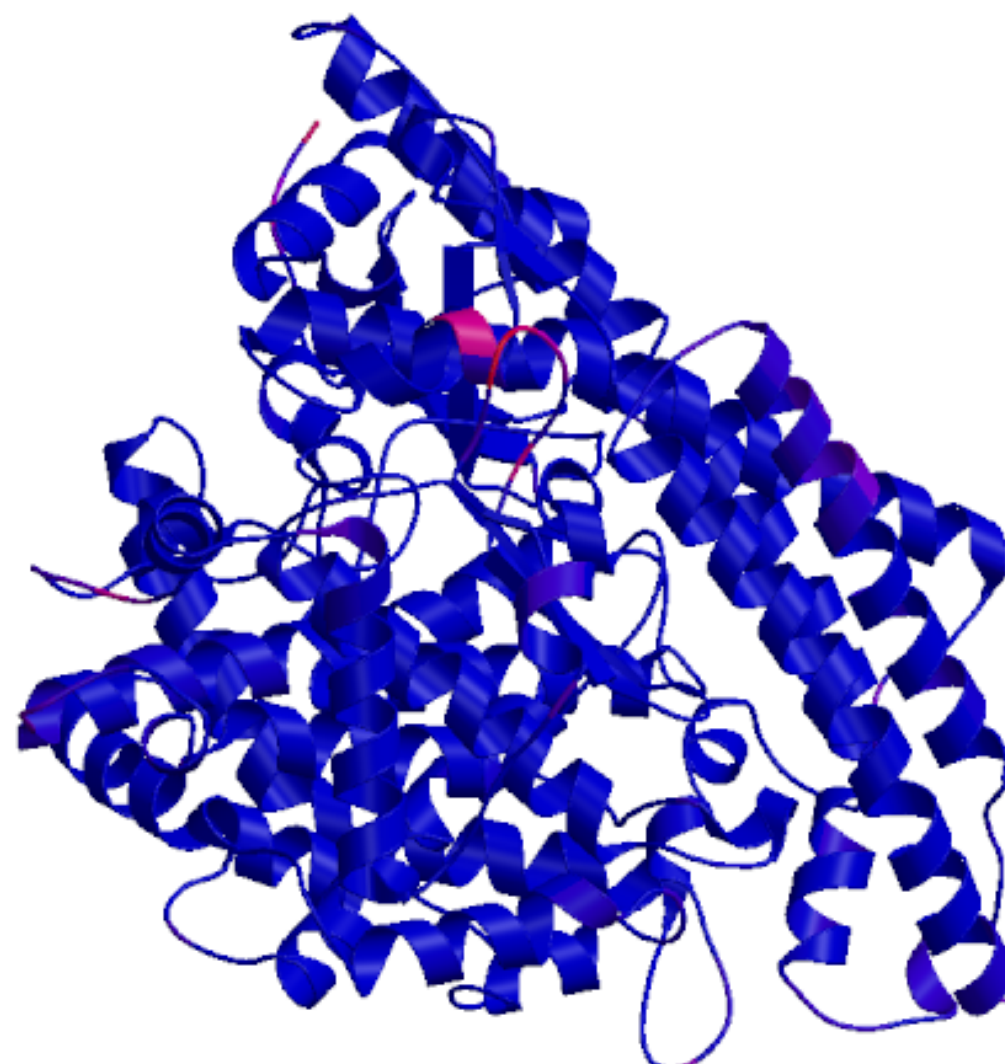

Global Score  
0.84 ± 0.05

**Hdock K26R model**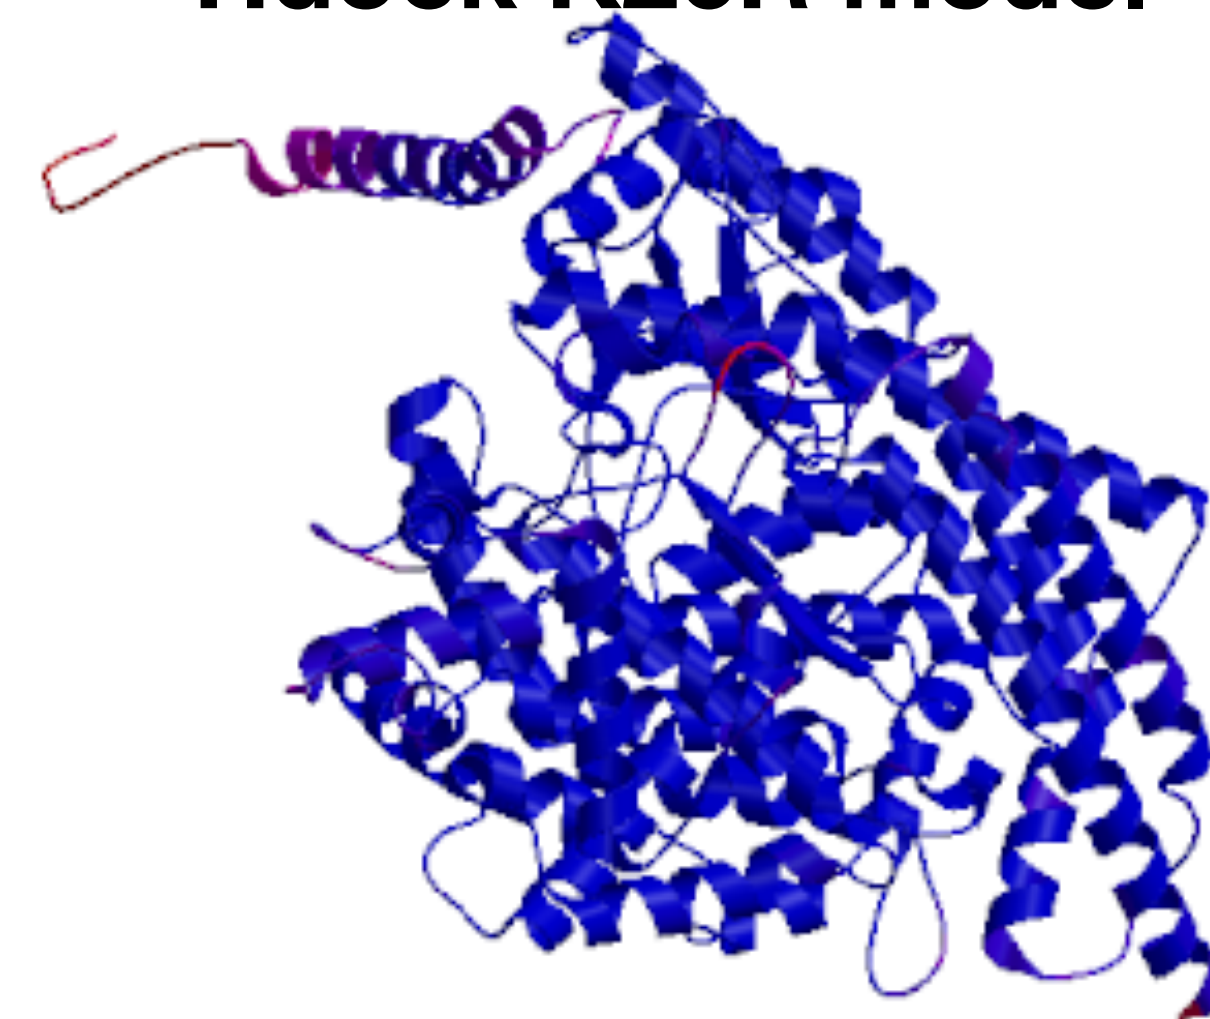

Global Score  
0.83 ± 0.05

**6M17**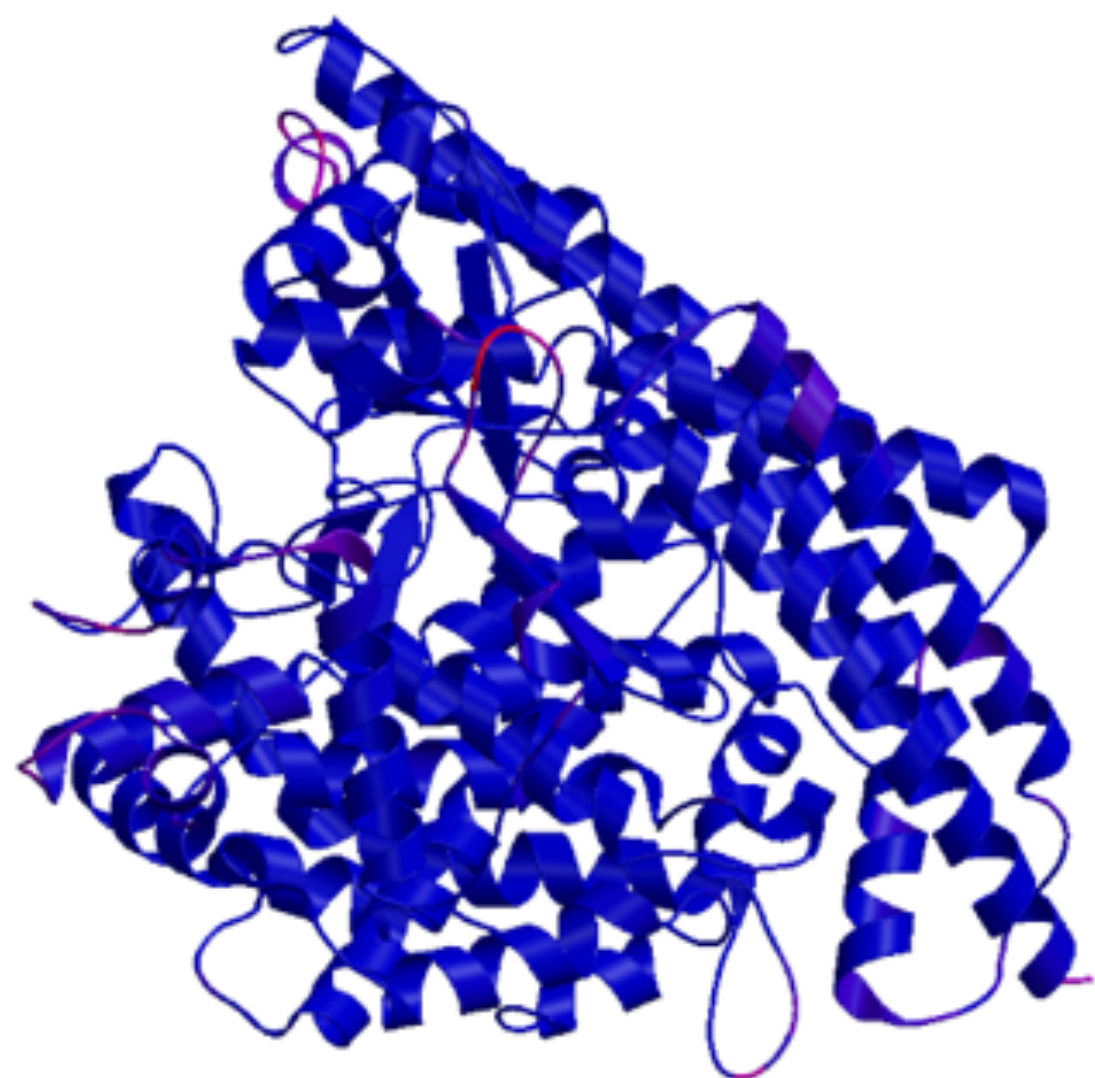

Global Score  
0.83 ± 0.05

**Hdock K26R model**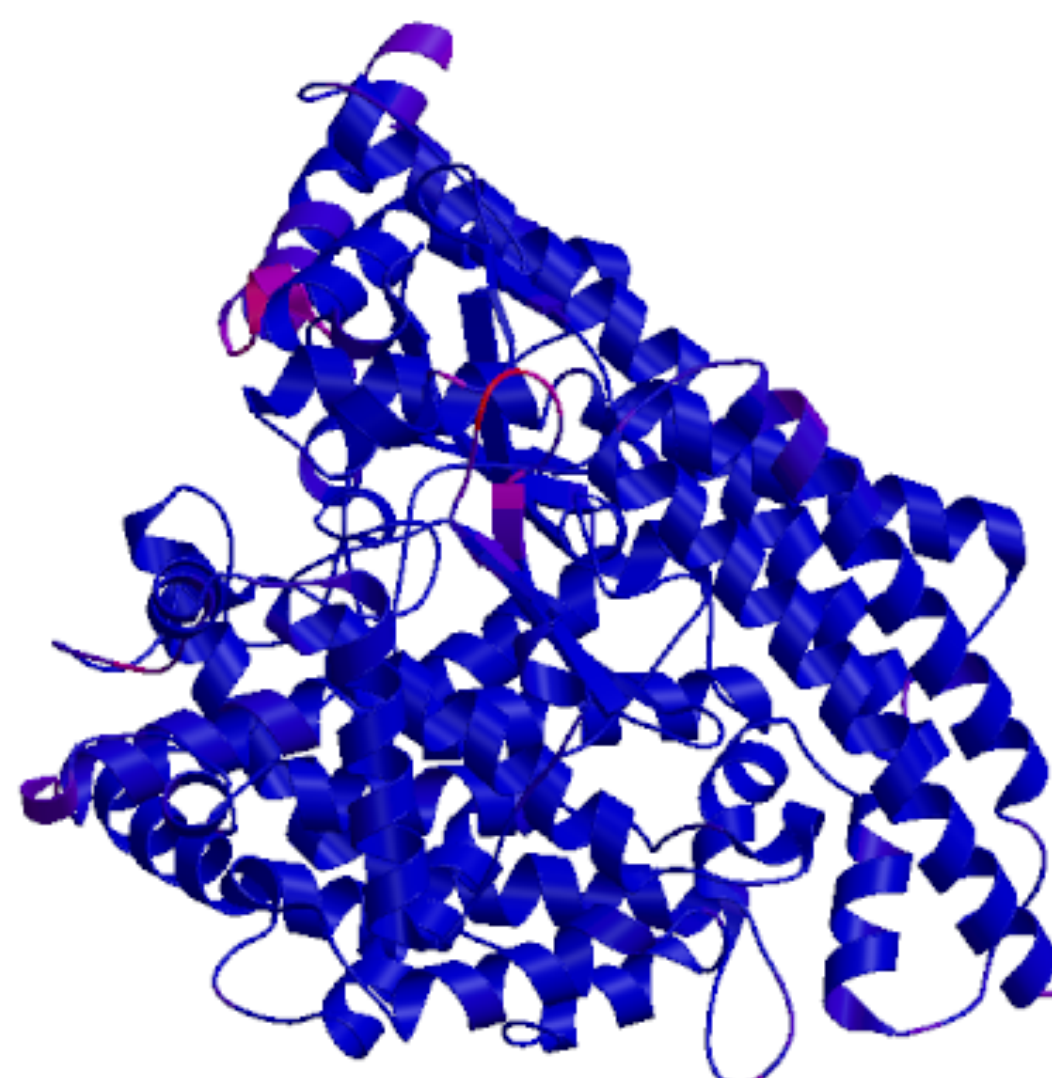

Global Score  
0.83 ± 0.05

**Hdock K26R model**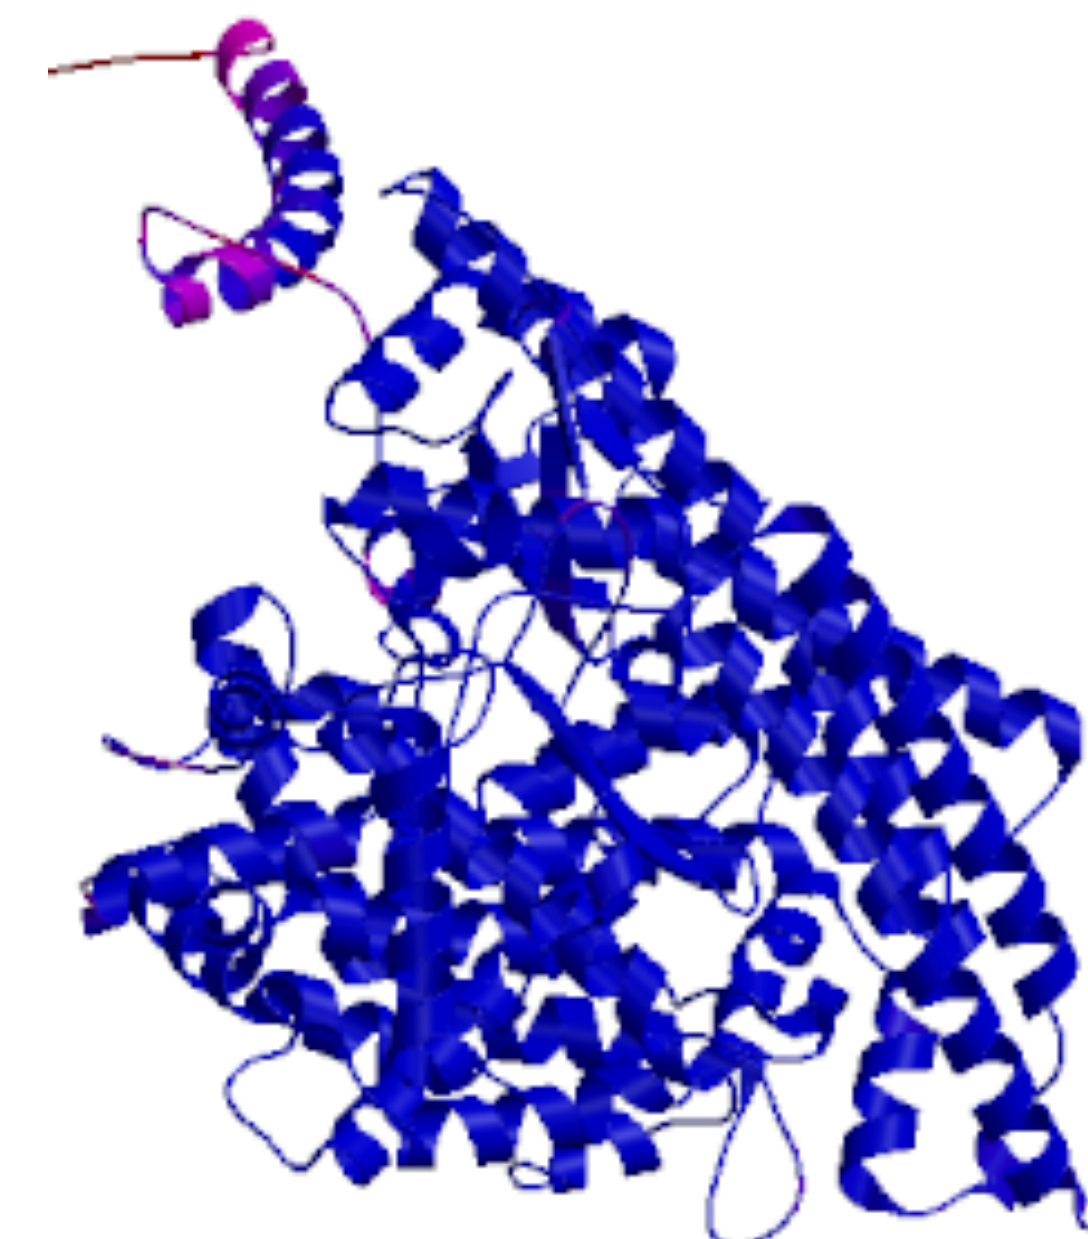

Global Score  
0.83 ± 0.05

**MolProbity**

|                                     |                   |
|-------------------------------------|-------------------|
| <b>6M17</b>                         | Bad bonds: 0.03%  |
| <b>6M17</b>                         | Bad angles: 0.01% |
| <b>Modeller WT</b>                  | Bad bonds: 0.00%  |
| <b>Modeller WT</b>                  | Bad angles: 1.24% |
| <b>Modeller K26R</b>                | Bad bonds: 0.00%  |
| <b>Modeller K26R</b>                | Bad angles: 1.24% |
| <b>K26R (Hdock) - Homolgy model</b> | Bad bonds: 0.00%  |
| <b>K26R (Hdock) - Homolgy model</b> | Bad angles: 0.77% |
| <b>K26R (Hdock) - Docking model</b> | Bad bonds: 0.00%  |
| <b>K26R (Hdock) - Docking model</b> | Bad angles: 0.77% |
| <b>WT (Hdock)</b>                   | Bad bonds: 0.00%  |
| <b>WT (Hdock)</b>                   | Bad angles: 0.80% |
