# Supplementary material
Source: PubMed Central journal article supplement (PMC7834737)

**Frequencies of ACE2 polymorphisms that increase the binding affinity between ACE2 receptor and RDB of Spike (according GnomAD\_exome database)**

The diffusion of polymorphisms rs1434130600 (A25T) and rs867318181 (E75G) is 0, according to GnomAD\_exome database

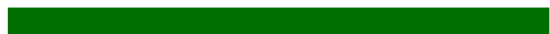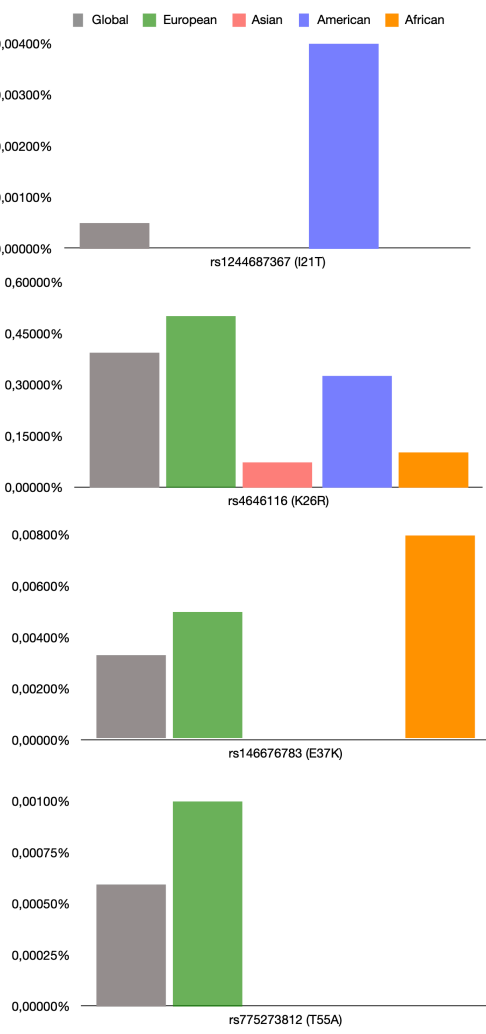

**Frequencies of ACE2 polymorphisms that decrease the binding affinity between ACE2 receptor and RDB of Spike (according GnomAD\_exome database)**

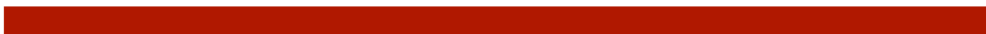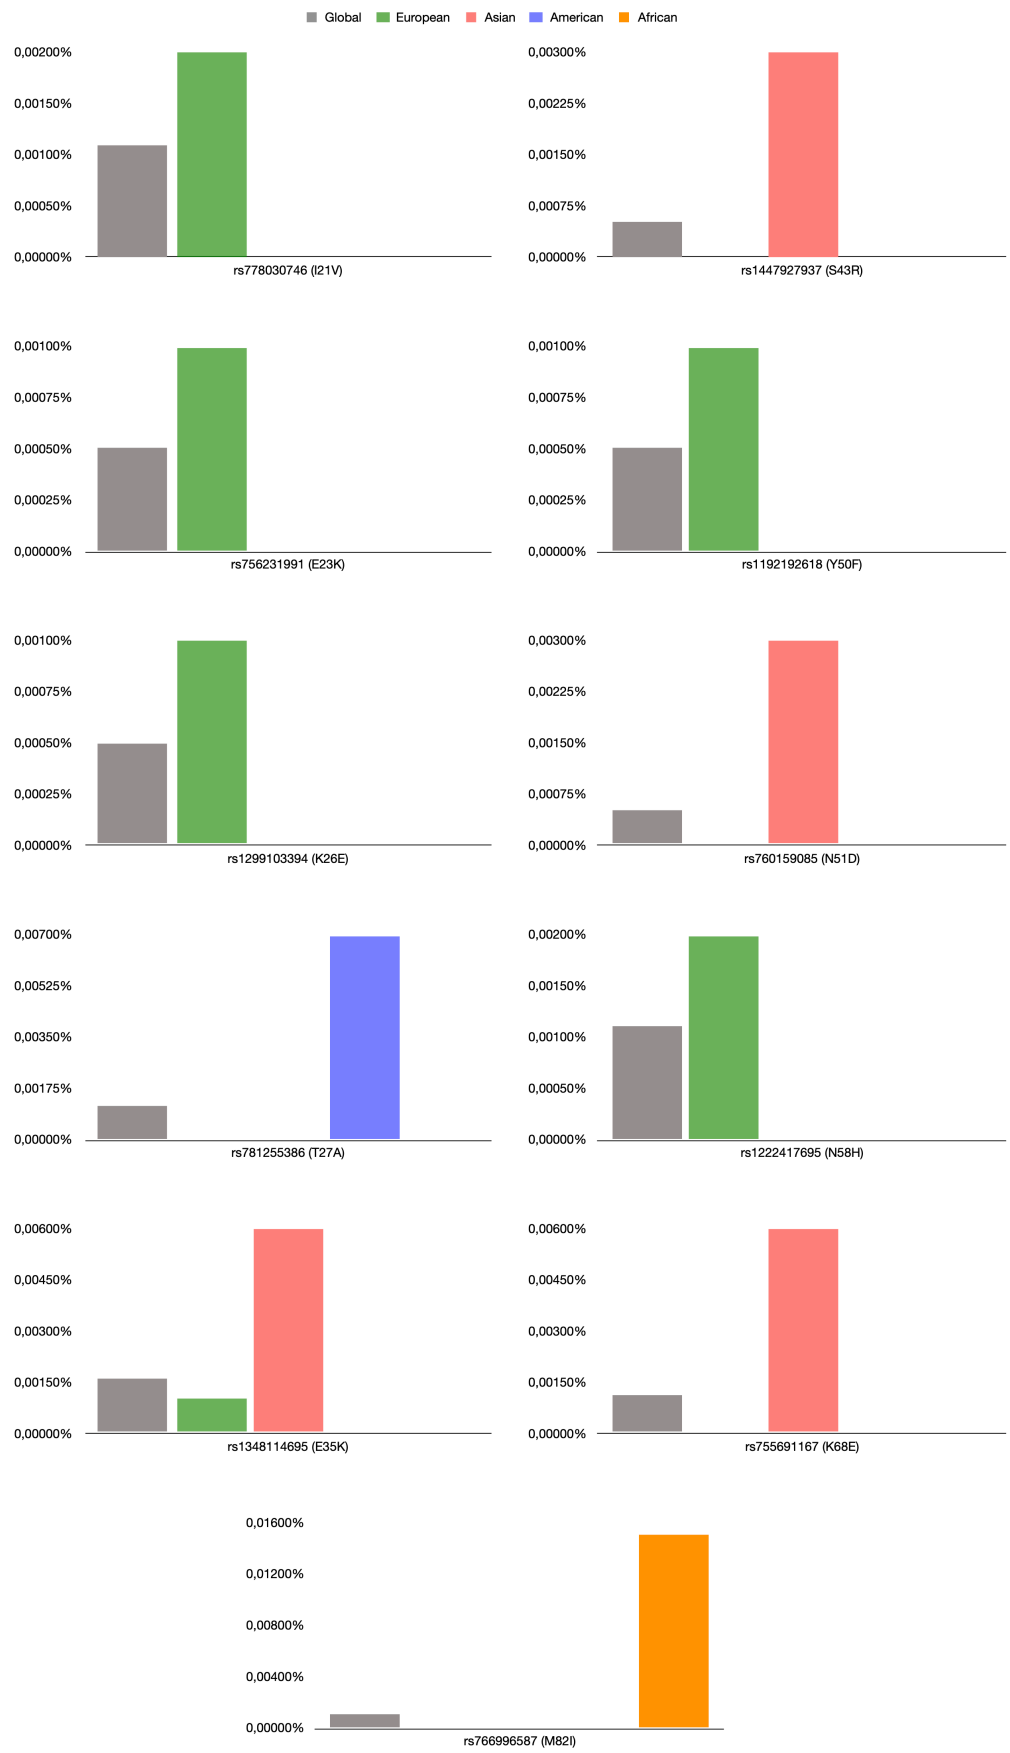

Supplement: mmc4.pdf [file mmc4.pdf]
